# Supplementary material
Source: ML conference proceedings conference paper supplement (https://proceedings.mlr.press/v108/prasad20a.html)
Supplement: Supplementary file [file prasad20a-supp.pdf]

## A Proofs

### A.1 Proof of Lemma 1

*Proof.* Let  $P = \mathcal{N}(0, \mathcal{I}_p)$  be the isotropic normal distribution. Let  $R_P(\theta) = \mathbb{E}_{z \sim P}[\ell(\|z - \theta\|_2)]$ , where  $\ell : \mathbb{R} \mapsto \mathbb{R}$  is a convex loss, and let  $\theta(P) = \operatorname{argmin}_\theta R_P(\theta)$  be the minimizer of the population risk. We assume that  $\psi(\cdot) = \ell'(\cdot) < C$  is bounded. Note that when the derivative is unbounded, it is easy to argue that the corresponding risk will be non-robust. We also assumed that this risk is fisher-consistent for the Gaussian-distribution, *i.e.*  $\theta(P) = 0$ . For notational convenience, let  $u(t) = \frac{\psi(t)}{t}$ . Then,

$$\nabla R_P(\theta) = -\mathbb{E}_{z \sim P} \left[ \underbrace{\frac{\psi(\|z - \theta\|_2)}{\|z - \theta\|_2}}_{u(\|z - \theta\|_2)} (z - \theta) \right].$$

As before, let  $P_\epsilon = (1 - \epsilon)P + \epsilon Q$ . Then, we are interested in studying  $\hat{\theta}(P_\epsilon)$ . To do this, by first order optimality, we know that  $\theta(P_\epsilon)$  is a solution to the following equation:

$$(1 - \epsilon)\nabla R_P(\theta(P_\epsilon)) + \epsilon\nabla R_Q(\theta(P_\epsilon)) = 0$$

First we calculate the derivative of  $\theta(P_\epsilon)$  w.r.t.  $\epsilon$  using the fixed point above. Taking derivative of the above equation w.r.t.  $\epsilon$

$$(1 - \epsilon)\nabla^2 R_P(\theta(P_\epsilon))\dot{\theta}(P_\epsilon) - \nabla R_P(\theta(P_\epsilon)) + \epsilon\nabla^2 R_Q(\theta(P_\epsilon))\dot{\theta}(P_\epsilon) + \nabla R_Q(\theta(P_\epsilon)) = 0 \quad (8)$$

Under our assumption that  $\psi$  is continuous, we get that at  $\epsilon = 0$ ,

$$\dot{\theta}(P_\epsilon)|_{\epsilon=0} = (-\nabla^2 R_P(\theta(P)))^{-1}\nabla R_Q(\theta(P)) \quad (9)$$

By fisher consistency of  $\ell$  for  $\mathcal{N}(0, \mathcal{I}_p)$ , we have that  $\theta(P) = 0$ . Suppose that  $Q$  is a point mass distribution with all mass on  $\theta_Q$ . Then, we have that,

$$\nabla R_Q(0) = -u(\|\theta_Q\|_2)\theta_Q$$

Our next step is to lower bound the operator norm of  $-\nabla^2 R_P(\theta(P))$ . To do this we show that for any unit vector  $v \in \mathcal{S}^{p-1}$ ,  $v^T(-\nabla^2 R_P(\theta(P)))v \leq \frac{C_2}{\sqrt{p}}$ .

$$\nabla^2 R_P(\theta) = -\mathbb{E}_{z \sim P} \left[ u(\|z - \theta\|_2)\mathcal{I}_p + \frac{u'(\|z - \theta\|_2)}{\|z - \theta\|_2}((z - \theta)(z - \theta)^T) \right]$$

Now, by definition  $u(t) = \psi(t)/t$ , so  $u'(s) = (\psi'(s) - u(s))/s$ . Plugging this above,

$$\nabla^2 R_P(\theta) = -\mathbb{E}_{z \sim P} \left[ u(\|z - \theta\|_2)\left(\mathcal{I}_p - \frac{(z - \theta)(z - \theta)^T}{\|z - \theta\|_2^2}\right) + \frac{\psi'(\|z - \theta\|_2)}{\|z - \theta\|_2^2}(z - \theta)(z - \theta)^T \right]$$

Hence, we get that

$$v^T \nabla^2 R_P(0)v = -\mathbb{E}_{z \sim N(0, I_p)} \left[ u(\|z\|_2)(\|v\|_2^2 - (v^T(z/\|z\|_2))^2) + \psi'(\|z\|_2)(v^T(z/\|z\|_2))^2 \right]$$

Further for Isotropic Gaussian,  $\|z\|_2$  and  $z/\|z\|_2$  are independent random variables. Also, since,  $z/\|z\|_2$  is uniformly distributed on unit sphere, we get that  $\mathbb{E}_{z \sim N(0, I)}[(v^T z/\|z\|_2)^2] = \|v\|_2^2/p$ .

$$(v^T(-\nabla^2 R_P(0))v) = \underbrace{\mathbb{E}_{z \sim N(0, I_p)} [u(\|z\|_2)](1 - 1/p)}_{\mathbf{T1}} + \underbrace{\mathbb{E}_{z \sim N(0, I_p)} [\psi'(\|z\|_2)]/p}_{\mathbf{T2}}$$

- **Controlling T1**

$$\begin{aligned}
 \mathbb{E}_{z \sim \mathcal{N}(0, I_p)}[u(\|z\|_2)] &= \mathbb{E}_{z \sim \mathcal{N}(0, I_p)} \left[ \frac{\psi(\|z\|_2)}{\|z\|_2} \right] \\
 &\leq \sqrt{C \mathbb{E} \frac{1}{\|z\|_2^2}} \\
 &\leq \frac{\sqrt{C_1}}{\sqrt{p-2}},
 \end{aligned} \tag{10}$$

where we use that  $\psi$  is bounded by constant  $C$ . The last inequality is combination of Jensen's Inequality and plugging the mean of reciprocal of inverse chi-squared random variable ([Bernardo and Smith, 2009](#)).

- **Controlling T2.** Under our assumption that  $\psi'(\cdot)$  exists and is bounded, we get that  $T2 \leq \frac{C_1}{p}$  and can be ignored.

Hence, for large  $p$ , we get that  $(v^T(-\nabla^2 R_P(0))v) \leq \sqrt{C_1/p}$ . Now, if we put  $\theta_Q$  at  $\infty$ , and use that  $\psi(\infty) = C_1$ , we get that,

$$\|\dot{\theta}(P_\epsilon)\|_2 = \psi(\|\theta_Q\|_2) \|\nabla^2 R_P(0) \frac{\theta_Q}{\|\theta_Q\|_2}\|_2 \geq C_2 \sqrt{p}$$

□

## A.2 Proof of Lemma 2

*Proof.* Let  $P = N(0, \mathcal{I}_p)$ . Every subset of size  $(1 - \epsilon)n$  can be thought of as samples from a mixture distribution defined in (3), where the mixture proportion  $\eta$ , ranges from  $[0, \epsilon/(1 - \epsilon)]$ . In the asymptotic setting of  $n \mapsto \infty$ , the empirical squared loss over each subset corresponds to the population risk with the sampling distribution as  $P_\eta$ . For a given contamination distribution  $Q$ , let  $R_{P_\eta}(\theta) = \mathbb{E}_{x \sim P_\eta} [\|x - \theta\|_2^2]$  and let  $\theta(P_\eta) \stackrel{\text{def}}{=} \operatorname{argmin}_\theta R_{P_\eta}(\theta)$ , then subset risk minimization returns,

$$\begin{aligned} \widehat{\theta}_{\text{SRM}} &= \theta(P_{\eta^*}) \\ \text{where } \eta^* &= \operatorname{argmin}_{\eta \in [0, \frac{\epsilon}{1-\epsilon}]} R_{P_\eta}(\theta(P_\eta)) \end{aligned} \quad (11)$$

We are interested in bounding the bias of SRM *i.e.*

$$\sup_Q \|\widehat{\theta}_{\text{SRM}} - \theta^*\|_2$$

To do this, we know that for any contamination distribution  $Q$ , the solution of SRM necessarily satisfies the following conditions.

**Condition 1: Local Stationarity.**  $\theta(P_\eta) = \operatorname{argmin}_\theta R_{P_\eta}(\theta)$  is the minimizer of the risk with respect to a mixture distribution iff

$$\begin{aligned} \nabla R_{P_\eta}(\theta(P_\eta)) &= (1 - \eta)\nabla R_{P_{\theta^*}}(\theta(P_\eta)) \\ &+ \eta\nabla R_Q(\theta(P_\eta)) = 0. \end{aligned} \quad (12)$$

**Condition 2: Global Fit Optimality.**  $\widehat{\theta}_{\text{SRM}} = \theta(P_{\eta^*})$  is the global minimizer of the population risk over all mixture distributions iff

$$\begin{aligned} R_{P_{\eta^*}}(\theta(P_{\eta^*})) &= (1 - \eta^*)R_{P_{\theta^*}}(\theta(P_{\eta^*})) + \eta^*R_Q(\theta(P_{\eta^*})) \\ &\leq R_{P_\eta}(\theta(P_\eta)) \quad \forall \eta \in \left[0, \frac{\epsilon}{1-\epsilon}\right] \end{aligned} \quad (13)$$

Using Conditions 1 and 2, we next derive the bias of SRM for mean estimation.

We make a few simple observations.

- **Observation 1.** For any distribution  $P$ , we have,

$$R_P(\theta) = \operatorname{trace}(\Sigma(P)) + \|\theta - \mu(P)\|_2^2$$

- **Observation 2.** Condition 1 reduces to,

$$\mu(P_\eta) = \theta_\eta = (1 - \eta)\mu(P) + \eta\mu(Q),$$

where  $\mu(\cdot)$  is the Expectation functional.

**Lemma 9.** *Under the mixture model in Equation (3), for the squared error, we have that,*

$$R_{P_\eta}(\theta_\eta) = \operatorname{trace}(\Sigma(P_\eta)) = (1 - \eta)\operatorname{trace}(\Sigma(P^*)) + \eta\operatorname{trace}(\Sigma(Q)) + \eta(1 - \eta)\|\mu(P^*) - \mu(Q)\|_2^2.$$

Now, from Lemma 9, we know that

$$R_{P_\eta}(\theta_\eta) = (1 - \eta)\operatorname{trace}(\Sigma(P)) + \eta\operatorname{trace}(\Sigma(Q)) + \eta(1 - \eta)\|\mu(P) - \mu(Q)\|_2^2$$

As a function of  $\eta$ ,  $R_{P_\eta}(\theta_\eta)$  is a concave quadratic function. Hence, it is always minimized at the end points of the interval  $[0, \epsilon/(1 - \epsilon)]$ , which implies that  $\eta^* \in \{0, \frac{\epsilon}{1-\epsilon}\}$ .

Hence, we have that,

$$\widehat{\theta}_{\text{SRM}} = \begin{cases} \theta_{\frac{\epsilon}{1-\epsilon}}, & \text{if } R_{P_{\frac{\epsilon}{1-\epsilon}}}(\theta_{\frac{\epsilon}{1-\epsilon}}) \leq R_{P_0}(\theta_0). \\ \theta^*, & \text{otherwise.} \end{cases}$$

From Lemma 9,  $R_{P_{\frac{\epsilon}{1-\epsilon}}}(\theta_{\frac{\epsilon}{1-\epsilon}}) \leq R_{P_0}(\theta_0)$  iff

$$\left(1 - \frac{\epsilon}{1-\epsilon}\right) \|\mu(P) - \mu(Q)\|_2^2 \leq \text{trace}(\Sigma(P)) - \text{trace}(\Sigma(Q))$$

Moreover, from Observation 2, we have that,

$$\|\theta_{\frac{\epsilon}{1-\epsilon}} - \mu(P)\|_2 = \frac{\epsilon}{1-\epsilon} \|\mu(P) - \mu(Q)\|_2$$

Combining the above two, we get that,

$$\begin{aligned} \|\widehat{\theta}_{\text{SRM}} - \mu(P)\|_2 &= \left[ \frac{\epsilon}{1-\epsilon} \|\mu(P) - \mu(Q)\|_2 \right] \cdot \mathbf{1} \left\{ \|\mu(P) - \mu(Q)\|_2^2 \leq \right. \\ &\quad \left. \left( \frac{1-\epsilon}{1-2\epsilon} \right) (\text{trace}(\Sigma(P)) - \text{trace}(\Sigma(Q))) \right\}. \end{aligned} \quad (14)$$

Equation 6 follows from it. □

### A.2.1 Proof of Lemma 9

*Proof.* We give two alternate proofs of the Lemma.

- Proof 1: This proceeds by expanding on the definition of risk.

$$\begin{aligned} R_{P_\eta}(\theta_\eta) &= E_{z \sim P_\eta} [\|z - \theta_\eta\|_2^2] \\ &= (1-\eta) E_{z \sim P_0} [\|z - \theta_\eta\|_2^2] + \eta E_{z \sim Q} [\|z - \theta_\eta\|_2^2] \quad \text{Expectation by conditioning.} \\ &= (1-\eta) [\text{trace}(\Sigma(P^*)) + \|\theta_\eta - \mu(P^*)\|_2^2] \\ &\quad + \eta [\text{trace}(\Sigma(Q)) + \|\theta_\eta - \mu(Q)\|_2^2] \quad \text{From Observation 1.} \end{aligned}$$

Now, using Observation 2 we get that,

$$\begin{aligned} \|\theta_\eta - \mu(Q)\|_2 &= (1-\eta) \|\mu(P^*) - \mu(Q)\|_2 \\ \|\theta_\eta - \mu(P^*)\|_2 &= \eta \|\mu(P^*) - \mu(Q)\|_2 \end{aligned}$$

Plugging this into above, we get,

$$R_{P_\eta}(\theta_\eta) = (1-\eta) \text{trace}(\Sigma(P^*)) + \eta \text{trace}(\Sigma(Q)) + \|\mu(P^*) - \mu(Q)\|_2^2 (\eta^2(1-\eta) + (1-\eta)^2\eta)$$

which recovers the statement of the Lemma.

- Proof 2: This proceeds by Law of Total Variance, or the Law of Total Cummulants. We know that  $R_{P_\eta} = \text{trace}(\Sigma(P_\eta))$ . Let  $Z \sim P_\eta$ , and let  $Y \sim \text{Bernoulli}(1-\eta)$  be the indicator if the sample is from the true distribution. Then  $Z|Y=1 \sim P^*$ , while  $Z|Y=0 \sim Q$ .

$$\text{trace}(\Sigma(P_\eta)) = \underbrace{(1-\eta) \text{trace}(\Sigma(P^*)) + \eta \text{trace}(\Sigma(Q))}_{\text{Var}(E[Z|Y])} + \underbrace{\eta(1-\eta) \|\mu(P^*) - \mu(Q)\|_2^2}_{E[\text{Var}(Z|Y)]}.$$

□

### A.3 Proof of Lemma 3

*Proof.* Let  $P_\epsilon = (1 - \epsilon)P^* + \epsilon Q$ . Let  $I^*$  be the interval  $\mu \pm \frac{\sigma}{\delta_1^{2k}}$ , where  $\mu = \mathbb{E}_{x \sim P^*}[x]$ . Moreover for notational convenience, let  $f_n(u, v) = \sqrt{u(1-u)} \sqrt{\frac{\log(2/v)}{n}} + \frac{2}{3} \frac{\log(2/v)}{n}$ . Let  $\hat{I} = [a, b]$  be the interval obtained using  $\mathcal{Z}_1$ , i.e. the shortest interval containing  $n(1 - (\delta_1 + \epsilon + f_n(\epsilon + \delta_1, \delta_3)))$  points of  $\mathcal{Z}_1$ . Note that in the algorithm, we have  $\delta_1 = \epsilon$ , and  $\delta_3 = \delta/4$ . As a first step, we bound the length of  $\hat{I}$  and show that  $\hat{I}$  and  $I^*$  must necessarily intersect.

**Claim 1.** *Let  $\hat{I}$  be the shortest interval containing  $1 - \delta_4$  fraction of points, where  $\delta_4 = (\delta_1 + \epsilon) + f_n(\epsilon + \delta_1, \delta_3)$ . Further assume that  $\delta_4 < \frac{1}{2}$ . Then with probability at least  $1 - \delta_3$ ,*

$$\text{length}(\hat{I}) \leq \text{length}(I^*) \leq \frac{2\sigma}{\delta_1^{2k}},$$

Moreover, if  $\delta_4 < \frac{1}{2}$ , then  $\hat{I} \cap I^* \neq \phi$ , which implies

$$|z - \mu| \leq \frac{4\sigma}{\delta_1^{2k}} \forall z \in \hat{I}$$

*Proof.* We first show that with probability at least  $1 - \delta_3$ ,  $I^*$  contains at least  $n(1 - \delta_4)$  points (Claim 5). Hence, since our algorithm chooses the shortest interval ( $\hat{I}$ ) containing  $1 - \delta_4$  fraction of points, length of  $\hat{I}$  is less than length of  $I^*$ . Next, if  $\delta_4$  is less than  $\frac{1}{2}$ , then there are two intervals  $\hat{I}$  and  $I^*$  respectively, which contain at least  $n/2$  points. Hence, they must necessarily intersect.  $\square$

Next, we control the final error of our estimator. Let  $|\hat{I}| = \sum_{z \in \mathcal{Z}_2} \mathbb{I}\{z_i \in \hat{I}\}$  be the number of points which lie in  $\hat{I}$ . Similarly, let  $|\hat{I}_Q|$  and  $|\hat{I}_{P^*}|$  number of points which lie in  $\hat{I}$ , which are distributed according to  $Q$  and  $P^*$  respectively.

$$\left| \frac{1}{|\hat{I}|} \sum_{x_i \in \hat{I}} x_i - \mu \right| \leq \underbrace{\left| \frac{1}{|\hat{I}|} \sum_{\substack{x_i \in \hat{I} \\ x_i \sim Q}} (x_i - \mu) \right|}_{T1} + \underbrace{\left| \frac{1}{|\hat{I}|} \sum_{\substack{x_i \in \hat{I} \\ x_i \sim P^*}} (x_i - \mu) \right|}_{T2} \quad (15)$$

**Control of T1.** To control T1, we can write it as:

$$\begin{aligned} T1 &= \left| \frac{1}{|\hat{I}|} \sum_{\substack{x_i \in \hat{I} \\ x_i \sim Q}} (x_i - \mu) \right| \\ &\leq \underbrace{\frac{|\hat{I}_Q|}{|\hat{I}|}}_{T1a} \underbrace{\max_{\substack{x_i \in \hat{I} \\ x_i \sim Q}} |x_i - \mu|}_{T1b} \end{aligned} \quad (16)$$

where  $\hat{I}_Q$  is the number of points in  $\hat{I}$  distributed according to  $Q$ . To control T1a, we use Bernsteins inequality. To control T1b, we use Claim 1. The claim below formally controls T1.

**Claim 2.** *Let  $\hat{I}$  be the shortest interval containing  $n(1 - \delta_4)$  of the points, where  $\delta_4 = (\delta_1 + \epsilon) + f_n(\epsilon + \delta_1, \delta_3)$ . Further assume that  $\delta_4 < \frac{1}{2}$ . Then, with probability at least  $1 - \delta_3 - \delta_5$ , we have that,*

$$T1 \leq \frac{|\hat{I}_Q|}{|\hat{I}|} \max_{\substack{x_i \in \hat{I} \\ x_i \sim Q}} |x_i - \mu| \leq \frac{\epsilon + f_n(\epsilon, \delta_5)}{1 - \delta_4} \frac{4\sigma}{\delta_1^{1/2k}} \quad (17)$$

*Proof.* Using Bernstein's bound, we know that wp at least  $1 - \delta_5$ ,

$$|\hat{I}_Q| \leq n(\epsilon + \sqrt{\epsilon(1-\epsilon)})\sqrt{\frac{\log(1/\delta_5)}{n}} + \frac{2}{3}\frac{\log(1/\delta_5)}{n},$$

This follows from the fact that number of points drawn from  $Q$  which lie in  $\hat{I}$  is less than the total number of points drawn according to  $Q$ . In Claim 1, we showed that when  $\delta_4 < \frac{1}{2}$ , then, with probability at least  $1 - \delta_3$ , we get that  $\hat{I} \cap I^* \neq \phi$ , i.e. the intervals intersect, and that  $\text{length}(\hat{I}) < \text{length}(I^*)$ . Hence, we get,

$$\max_{\substack{x_i \in \hat{I} \\ x_i \sim Q}} |x_i - \mu| \leq \frac{4\sigma}{\delta_1^{1/2k}}$$

□

**Control of T2.** To control T2, we write it as

$$T2 = \left| \frac{|\hat{I}_{P^*}|}{|\hat{I}|} \left[ \frac{1}{|\hat{I}_{P^*}|} \sum_{\substack{x_i \in \hat{I} \\ x_i \sim P^*}} (x_i - \mu) \right] \right| \quad (18)$$

$$\leq \frac{|\hat{I}_{P^*}|}{|\hat{I}|} \underbrace{\left( \frac{1}{|\hat{I}_{P^*}|} \sum_{\substack{x_i \in \hat{I} \\ x_i \sim P^*}} x_i \right) - E[x|x \in \hat{I}, x \sim P^*]}_{T2a} + \frac{|\hat{I}_{P^*}|}{|\hat{I}|} \underbrace{\left| E[x|x \in \hat{I}, x \sim P^*] - \mu \right|}_{T2b} \quad (19)$$

- **Control of T2a:** To bound the distance between the mean of the points from  $P^*$  within  $\hat{I}$  and  $E[x|x \sim P^*, x \in \hat{I}]$ , we will use Bernsteins bound(Lemma 10) for bounded random variables. We know that the random variables are in a bounded interval  $b = \text{length}(\hat{I}) \leq \frac{\sigma}{\delta_1^{2k}}$ , and that conditional variance of the random variables, when conditioned on them lying in  $\hat{I}$  is controlled using Lemma 13. In particular, Lemma 13 shows that for any event  $E$ , which occurs with probability  $P(E) \geq \frac{1}{2}$ ,

$$E_{x \sim P^*} [(x - E[x|x \in E])^2 | x \in E] \leq \sigma^2 / P(E).$$

Using these arguments, we get that with probability at least  $1 - \delta_7$ ,

$$T2a \leq \sqrt{\frac{2\sigma^2(\log(3/\delta_7))}{P^*(\hat{I})|\hat{I}_{P^*}|}} + \frac{2\sigma}{\delta_1^{1/2k}} \frac{\log(3/\delta_7)}{|\hat{I}_{P^*}|}, \quad (20)$$

where  $P^*(\hat{I})$  is the probability that a random variable drawn according to  $P^*$  lies in  $\hat{I}$ .

- **Control of T2b:** To control  $T2b$ , we use the general mean shift lemma (Lemma 12), which controls how far the mean can move when conditioned on an event. We get that,

$$T2b \leq 2\sigma(P^*(\hat{I})^c)^{1-1/(2k)} \quad (21)$$

Combining the bounds in (20) and (21), we get

$$T2 \leq 2\sigma(P^*(\hat{I})^c)^{1-1/(2k)} + \sqrt{\frac{2\sigma^2(\log(3/\delta_7))}{P^*(\hat{I})|\hat{I}_{P^*}|}} + \frac{2\sigma}{\delta_1^{1/2k}} \frac{\log(3/\delta_7)}{|\hat{I}_{P^*}|} \quad (22)$$

Combining the upper bound on T1 in (17) with (22), we get that with probability at least  $1 - \delta_3 - \delta_5 - \delta_6 - \delta_7$

$$T1 + T2 \leq \frac{\epsilon + f_n(\epsilon, \delta_5)}{1 - \delta_4} \frac{4\sigma}{\delta_1^{1/2k}} + 2\sigma(P^*(\hat{I})^c)^{1-1/(2k)} + \sqrt{\frac{2\sigma^2(\log(3/\delta_7))}{P^*(\hat{I})|\hat{I}_{P^*}|}} + \frac{2\sigma}{\delta_1^{1/2k}} \frac{\log(3/\delta_7)}{|\hat{I}_{P^*}|}$$

We rearrange terms and use our assumption that  $\epsilon$  is small enough that  $\hat{I}_{P^*} \geq n/2$ . We also plugin the upper bound on  $(P^*(\hat{I})^c)^{1-1/(2k)}$  from Claim 3 and set  $\delta_1 = \epsilon$ , and  $\delta_5 = \delta_6 = \delta_3 = \delta_7 = \delta/4$ . Hence, we get that with probability at least  $1 - \delta$

$$T1 + T2 \leq C_1 \sigma \epsilon^{1-1/2k} + C_2 \sigma \left(\frac{\log n}{n}\right)^{1-\frac{1}{2k}} + C_3 \sigma \sqrt{\frac{\log(1/\delta)}{n}} + C_4 \sigma \frac{\log(1/\delta)}{n \epsilon^{\frac{1}{2k}}} \quad (23)$$

Since, we ensure that  $\epsilon = \max(\epsilon, \frac{\log(1/\delta)}{n})$  hence,  $\frac{\log(1/\delta)}{n \epsilon^{\frac{1}{2k}}} \leq \epsilon^{1-\frac{1}{2k}}$ . Note that our assumption of  $\delta_4 < \frac{1}{2}$  boils down to  $\epsilon$  being small enough such that  $2\epsilon + \sqrt{\epsilon \frac{\log(4/\delta)}{n}} + \frac{\log(4/\delta)}{n} < \frac{1}{2}$ . Hence, we recover the final statement of the theorem.  $\square$

### A.3.1 Auxillary Proofs

**Claim 3.** Let  $\hat{I}$  be the shorted interval containing  $n(1 - \delta_4)$  points from  $\mathcal{Z}_1$ . Let  $P^*(\hat{I})$  is the probability that a random variable drawn according to  $P^*$  lies in  $\hat{I}$ . Then, there exists universal constants  $C_1, C_2 > 0$  such that wp at least  $1 - \delta_6$ , we have that

$$(P^*(\hat{I})^c)^{1-\frac{1}{2k}} \leq C_1 \epsilon^{1-\frac{1}{2k}} + C_2 \delta_1^{1-\frac{1}{2k}} + C_3 \left(\frac{\log n}{n}\right)^{1-\frac{1}{2k}} + C_4 \left(\frac{\log(1/\delta_6)}{n}\right)^{1-\frac{1}{2k}} + C_5 \left(\frac{\log(1/\delta_3)}{n}\right)^{1-\frac{1}{2k}} \quad (24)$$

*Proof.* Note that  $\hat{I}$  is obtained by choosing the shortest interval containing  $n(1 - \delta_4)$  points from  $\mathcal{Z}_1$ . We first bound  $P_n^*(\hat{I})$ , i.e. the empirical probability of samples distributed according to  $P^*$  which lie in  $\hat{I}$ . To do this, note that in  $\mathcal{Z}_1$ , number of points drawn from  $Q$  which lie in  $\hat{I}$ , say  $\hat{n}_Q$  is less than the total number of points drawn according to  $Q$ . Using Bernstein's bound, we know that wp at least  $1 - \delta_6$ ,

$$|\hat{n}_Q| \leq n(\epsilon + \sqrt{\epsilon(1-\epsilon)}) \sqrt{\frac{\log(1/\delta_6)}{n}} + \frac{2 \log(1/\delta_6)}{3} \frac{1}{n}$$

Let  $\hat{n}_{P^*}$  be the number of points in  $\mathcal{Z}_1$ , which are drawn from  $P^*$  and which lie in  $\hat{I}$ . Since  $|\hat{n}_Q| + |\hat{n}_{P^*}| = |\hat{I}| = n(1 - \delta_4)$ , hence the above implies that with probability at least  $1 - \delta_6$ ,

$$|\hat{n}_{P^*}| \geq n(1 - \delta_4) - n(\epsilon + \sqrt{\epsilon(1-\epsilon)}) \sqrt{\frac{\log(1/\delta_6)}{n}} + \frac{2 \log(1/\delta_6)}{3} \frac{1}{n},$$

Note that  $P_n^*(\hat{I}) = \frac{|\hat{n}_{P^*}|}{\sum_i \mathbb{1}_{\{x_i \sim P^*\}}}$ . Hence, we get that,

$$\begin{aligned} P_n^*(\hat{I}) &\geq \frac{|\hat{n}_{P^*}|}{n} \\ &\geq 1 - (\epsilon + \delta_4) - f_n(\epsilon, \delta_6) \end{aligned} \quad (25)$$

This implies that,

$$\begin{aligned} P_n^*(\hat{I})^c &\leq (\epsilon + \delta_4) + f_n(\epsilon, \delta_6) \\ &\leq 2\epsilon + \delta_1 + f_n(\epsilon, \delta_6) + f_n(\epsilon + \delta_1, \delta_3) \\ &\leq 4\epsilon + 2\delta_1 + C_1 \frac{\log(1/\delta_6)}{n} + C_2 \frac{\log(1/\delta_3)}{n} \end{aligned} \quad (26)$$

To finally bound the probability of a sample drawn from  $P^*$  to lie in  $\hat{I}$ , we use the relative deviations VC bound(Lemma 11), which gives us,

$$P^*(\hat{I})^c \leq \underbrace{P_n^*(\hat{I})^c}_{A_1} + 4 \sqrt{\left(\frac{P_n^*(\hat{I})^c \log \mathcal{S}[2n]}{n}\right) + \left(\frac{P_n^*(\hat{I})^c \log(4/\delta_6)}{n}\right) + \frac{\log \mathcal{S}[2n]}{n} + \frac{\log(4/\delta_6)}{n}} \quad (27)$$

where  $\mathcal{S}[2n] = O(n^2)$ . Using that  $\sqrt{ab} \leq a + b, \forall a, b \geq 0$ , we get that,

$$P^*(\hat{I})^c \leq C_1 P_n^*(\hat{I})^c + C_2 \left( \frac{\log \mathcal{S}[2n]}{n} + \frac{\log(4/\delta_6)}{n} \right) \quad (28)$$

Hence, we get that,

$$(P^*(\hat{I})^c)^{1-\frac{1}{2k}} \leq C_1 \epsilon^{1-\frac{1}{2k}} + C_2 \delta_1^{1-\frac{1}{2k}} + C_3 \left( \frac{\log n}{n} \right)^{1-\frac{1}{2k}} + C_4 \left( \frac{\log(1/\delta_6)}{n} \right)^{1-\frac{1}{2k}} + C_5 \left( \frac{\log(1/\delta_3)}{n} \right)^{1-\frac{1}{2k}} \quad (29)$$

□

**Claim 4.** Let  $P^*(I^*)$  be the probability that a sample drawn according from  $P_\epsilon$  is distributed according to  $P^*$  and lies in  $I^*$ .

$$P^*(I^*) \geq (1 - \epsilon)(1 - \delta_1) = 1 - (\epsilon + \delta_1 - \epsilon\delta_1) \geq 1 - \underbrace{(\epsilon + \delta_1)}_{\delta_2} = 1 - \delta_2$$

*Proof.* For any  $x \sim P_\epsilon$ , define,  $z_i = 1$  if  $x \sim P^*$ . Now, for any  $x \sim P^*$ , we know that, by chebyshevs we know that,

$$P(|x - \mu| \geq t) = P((x - \mu)^{2k} \geq t^{2k}) \leq E[(x - \mu)^{2k}] / t^{2k} \leq C_{2k} \sigma^{2k} / t^{2k}$$

Hence, we get that wp at least  $1 - \delta_1$ ,  $x \in \mu \pm \sigma / (\delta_1)^{1/2k}$  □

The following claim lower bounds the empirical fraction of samples which are distributed according to  $P^*$  and lie in  $I^*$ , when  $n$  samples are drawn from  $P_\epsilon$ .

**Claim 5.** Let  $P_n^*(I^*)$  be the empirical fraction of points which are distributed according to  $P^*$  and lie in  $I^*$ , when  $n$  samples are drawn from  $P_\epsilon$ . Then, with probability at least  $1 - \delta_3$ ,

$$P_n^*(I^*) \geq 1 - \underbrace{(\delta_2 + \sqrt{(\delta_2(1 - \delta_2))} \sqrt{\frac{\log(1/\delta_3)}{n}} + \frac{2 \log(1/\delta_3)}{3n})}_{\delta_4 = (\delta_1 + \epsilon) + f_n(\epsilon + \delta_1, \delta_3)},$$

*Proof.* This follows from Bernstein's inequality (Lemma 10). □

**Lemma 10.** [Bernsteins bound,] Let  $X \sim P^*$  be a scalar random variable such that  $|X - E[x]| \leq b$  with variance  $\sigma^2$ . Then, given  $n$  samples  $\{x_1, x_2, \dots, x_n\} \sim P^*$ , the empirical mean,  $\bar{x}_n = \frac{1}{n} \sum_{i=1}^n x_i$  is such that,

$$P(|\bar{x}_n - E[x]| > t) \leq 2 \exp\left(\frac{-nt^2}{2\sigma^2 + 2bt/3}\right)$$

which can be equivalently re-written as. With probability at least  $1 - \delta$ ,

$$|\bar{x}_n - E[x]| \leq \sqrt{\frac{2\sigma^2 \log(1/\delta)}{n}} + \frac{2b \log(1/\delta)}{3n}$$

**Lemma 11.** [Relative deviations, (Vapnik and Chervonenkis, 2015)] Let  $\mathcal{F}$  be a function class consisting of binary functions  $f$ . Then, with probability at least  $1 - \delta$ ,

$$\sup_{f \in \mathcal{F}} |P(f) - P_n(f)| \leq 4 \sqrt{P_n(f) \frac{\log(S_{\mathcal{F}}(2n)) + \log(4/\delta)}{n}} + C_1 \frac{\log(S_{\mathcal{F}}(2n)) + \log(4/\delta)}{n},$$

where  $S_{\mathcal{F}}(n) = \sup_{z_1, z_2, \dots, z_n} |\{(f(z_1), f(z_2), \dots, f(z_n)) : f \in \mathcal{F}\}|$  is the growth function, i.e. the maximum number of ways into which  $n$ -points can be classified the function class.

**Lemma 12.** [General Mean shift, (Steinhardt, 2018)] Suppose that a distribution  $P^*$  has mean  $\mu$  and variance  $\sigma^2$  with bounded  $2k^{\text{th}}$ -moments. Then, for any event  $A$  which occurs with probability at least  $1 - \epsilon \geq \frac{1}{2}$ ,

$$|\mu - E[x|A]| \leq 2\sigma \epsilon^{1-\frac{1}{2k}}$$

In particular, for just bounded second moments, we get that  $|\mu - E[x|A]| \leq 2\sigma \sqrt{\epsilon}$ .



*Proof.* For any event  $E$ , Let  $\mathbb{I}\{E\}$  denote the indicator variable for  $E$ .

$$|E_{x \sim P^*}[x|E] - \mu| = \frac{|E_{x \sim P^*}((x - \mu)\mathbb{I}\{E\})|}{P(E)} \leq \frac{E[|x - \mu|^p]^{\frac{1}{p}}(E[\mathbb{I}\{E\}^q]^{1/q})}{P(E)}, \quad (30)$$

where  $p, q > 1$  are such that  $1/p + 1/q = 1$ . Put  $p = 2k$ , we get,

$$|E_{x \sim P^*}[x|E] - \mu| \leq \frac{\sigma}{(P(E))^{1/2k}}$$

Now, we know that,  $|E[X|A] - \mu| = \frac{1-P(A)}{P(A)}|E[X|A^c] - \mu|$ . Putting  $E = A^c$ , we get,

$$|E[X|A] - \mu| \leq \frac{1 - P(A)}{P(A)} \frac{\sigma}{(1 - P(A))^{1/2k}} \leq 2\sigma\epsilon^{(1 - \frac{1}{2k})}.$$

□

**Lemma 13.** *[Conditional Variance Bound] Suppose that a distribution  $P^*$  has mean  $\mu$  and variance  $\sigma^2$ . Then, for any event  $A$  which occurs with probability at least  $1 - \epsilon$ , the variance of the conditional distribution is bounded as:*

$$(E[(x - E[x|A])^2|A]) \leq \frac{\sigma^2}{(1 - \epsilon)}$$

*Proof.* Let  $\mu_A = E[y|A]$ ,  $d = \mu_A - \mu$ . From Lemma 12, we know,  $d \leq \sigma 2\sqrt{\epsilon}$ . Observe the following,

$$E[(y - \mu_A)^2|A] = E[(y - \mu - d)^2|A] = E[((y - \mu)^2 - 2d(y - \mu) + d^2)|A] \quad (31)$$

$$= E[(y - \mu)^2|A] - d^2 \quad (32)$$

$$\leq E[(y - \mu)^2|A] \quad (33)$$

$$\leq \frac{\sigma^2}{1 - \epsilon}, \quad (34)$$

□

#### A.4 Proof of Lemma 5

*Proof.* For brevity, let  $\widehat{\theta}_\delta = \operatorname{argmin}_\theta \sup_{u \in \mathcal{N}^{1/2}(\mathcal{S}^{p-1})} |u^T \theta - f(\{u^T x_i\}_{i=1}^n, \epsilon, \frac{\delta}{5^p})|$ , where  $f$  is our univariate estimator. Let  $\theta^* = \mathbb{E}[x]$  be the true mean. Then, we can write the  $\ell_2$  error in its variational form.

$$\|\widehat{\theta}_\delta - \theta^*\|_2 = \sup_{u \in \mathcal{S}^{p-1}} |u^T(\widehat{\theta}_\delta - \theta^*)| \quad (35)$$

Suppose  $\{y_j\}$  is a  $\frac{1}{2}$ -cover of the net, so there exist a  $y_j$  such that  $u = y_j + v$ , where  $\|v\|_2 \leq \epsilon$ .

$$\begin{aligned} \|\widehat{\theta}_\delta - \theta^*\|_2 &\leq \sup_{u \in \mathcal{S}^{p-1}} |y_j^T(\widehat{\theta}_\delta - \theta^*)| + |v^T(\widehat{\theta}_\delta - \theta^*)| \\ &\leq \sup_{y_j \in \mathcal{N}^{\frac{1}{2}}(\mathcal{S}^{p-1})} |y_j^T(\widehat{\theta}_\delta - \theta^*)| + \|v\|_2 \|\widehat{\theta}_\delta - \theta^*\|_2 \\ &\leq 2 \sup_{y_j \in \mathcal{N}^{\frac{1}{2}}(\mathcal{S}^{p-1})} |y_j^T(\widehat{\theta}_\delta - \theta^*)| \end{aligned}$$

$$\|\widehat{\theta}_\delta - \theta^*\|_2 \leq 2 \sup_{u \in \mathcal{N}^{1/2}} |u^T(\widehat{\theta} - \theta^*)| \quad (36)$$

$$\leq 2 \left[ \sup_{u \in \mathcal{N}^{1/2}} |u^T \widehat{\theta} - f(u^T P_n, \epsilon; \tilde{\delta})| + \sup_{u \in \mathcal{N}^{1/2}} |u^T \theta^* - f(u^T P_n, \epsilon; \tilde{\delta})| \right] \quad (37)$$

$$\leq 4 \sup_{u \in \mathcal{N}^{1/2}} |u^T \theta^* - f(u^T P_n, \epsilon; \tilde{\delta})| \quad (38)$$

For a fixed  $u$ , the distribution  $u^T P$  has mean  $u^T \theta^*$ , where  $\theta^*$  is the mean of the multivariate distribution  $P$ . Hence, we get that, for a confidence level  $\tilde{\delta}$ , when the univariate estimator is applied to the projection of the data long  $u$ , it returns a real number such that, with probability at least  $1 - \tilde{\delta}$

$$|f(u^T P_n; \epsilon; \tilde{\delta}) - u^T \theta^*| \leq C_1 \omega_f(\epsilon, u^T P, \tilde{\delta})$$

Taking a union bound over the elements of the cover, and using the fact that  $|\mathcal{N}^{1/2}(\mathcal{S}^{p-1})| \leq 5^p$  (Wainwright, 2019), we substitute  $\tilde{\delta} = \delta/(5^p)$  and recover the statement of the Lemma.  $\square$

#### A.5 Proof of Lemma 6

*Proof.* Let  $\widehat{\theta}_\delta = \operatorname{argmin}_{\theta \in \Theta_s} \sup_{u \in \mathcal{N}_{2s}^{1/2}(\mathcal{S}^{p-1})} |u^T \theta - f(\{u^T x_i\}_{i=1}^n, \epsilon, \frac{\delta}{(6ep/s)^s})|$ , where  $f(\cdot)$  is our univariate estimator.

Observe that since  $\widehat{\theta}_\delta$  and the true mean  $\theta^*$  are both  $s$ -sparse. Hence, the error vector  $\widehat{\theta} - \theta^*$  is atmost  $2s$ -sparse. Then, we can write the  $\ell_2$  error in its variational form,

$$\|\widehat{\theta}_\delta - \theta^*\|_2 = \sup_{u \in \mathcal{S}^{p-1} \cap \mathcal{B}_{2s}} |u^T(\widehat{\theta}_\delta - \theta^*)|, \quad (39)$$

where  $\mathcal{S}^{p-1} \cap \mathcal{B}_{2s}$  is the set of unit vectors which are  $2s$ -sparse. The remaining of the proof follows along the lines of proof of Lemma 5, coupled with the fact that the cardinality of the half-cover of an  $2s$ -sparse ball, *i.e.*  $|\mathcal{N}^{\frac{1}{2}}(\mathcal{S}^{p-1})| \leq (\frac{6ep}{s})^s$  (Vershynin, 2009).  $\square$

### A.6 Proof of Lemma 7

Let  $\widehat{\Theta}_f = \operatorname{argmin}_{\Theta \in \mathcal{F}} \sup_{u \in \mathcal{N}^{1/4}(\mathcal{S}^{p-1})} |u^T \Theta u - f(\{(u^T z_i)^2\}_{i=1}^n, 2\epsilon, \frac{\delta}{9^p})|$ , where  $f$  is a univariate estimator, and  $z_i$  are the pseudo-samples obtained by  $z_i = (x_{i+n/2} - x_i)/\sqrt{2}$ . We begin by first using one-step discretization,

$$\begin{aligned} \|\widehat{\Theta}_f - \Sigma(P)\|_2 &= \sup_{u \in \mathcal{S}^{p-1}} |u^T (\widehat{\Theta}_f - \Sigma(P))u| \\ &\leq \frac{1}{1 - 2\gamma} \sup_{y \in \mathcal{N}^\gamma} |y^T (\widehat{\Theta}_{\text{IM}} - \Sigma(P))y|, \end{aligned}$$

where  $\mathcal{N}^\gamma$  is the  $\gamma$ -cover of the unit sphere. We set  $\gamma = 1/4$ .

$$\|\widehat{\Theta}_f - \Sigma(P)\|_2 \leq 2 \sup_{u \in \mathcal{N}^{1/4}} |u^T (\widehat{\Theta}_f - \Sigma(P))u| \quad (40)$$

$$\leq 2 \left[ \sup_{u \in \mathcal{N}^{1/4}} |u^T \widehat{\Theta}_{\text{IM}} u - f(\{(u^T z_i)^2\}_{i=1}^n, 2\epsilon, \frac{\delta}{9^p})| + \sup_{u \in \mathcal{N}^{1/4}} |u^T \Sigma(P)u - f(\{(u^T z_i)^2\}_{i=1}^n, 2\epsilon, \frac{\delta}{9^p})| \right] \quad (41)$$

$$\leq 4 \sup_{u \in \mathcal{N}^{1/2}} |u^T \Sigma(P)u - f(u^T \mathcal{X}_n, \epsilon; \tilde{\delta})| \quad (42)$$

For a fixed  $u$ , for the clean samples in  $z_i$ ,  $(u^T z_i)^2$  has mean  $u^T \Sigma(P)u$ , and variance  $C_4(u^T \Sigma(P)u)^2$ . Note that the scalar random variables  $(u^T z_i)^2$  have bounded  $k$  moments, whenever  $x_i$  has bounded  $2k$ -moments. Hence, for a fixed  $u$ , we get that with probability at least  $1 - \delta$ ,

$$|f(\{(u^T z_i)^2\}_{i=1}^n, 2\epsilon, \frac{\delta}{9^p}) - u^T \Sigma(P)u| \lesssim \omega_f(2\epsilon, u^T P^{\otimes 2}, \tilde{\delta})$$

Taking a union bound over the elements of the cover, and using the fact that  $|\mathcal{N}^{1/4}(\mathcal{S}^{p-1})| \leq 9^p$  (Wainwright, 2019), we substitute  $\tilde{\delta} = \delta/(9^p)$  and recover the statement of the Lemma.

### A.7 Proof of Lemma 8

Let  $\widehat{\Theta}_{f,s} = \operatorname{argmin}_{\Theta \in \mathcal{F}_s} \sup_{u \in \mathcal{N}_{2s}^{1/4}(\mathcal{S}^{p-1})} |u^T \Theta u - f(\{(u^T z_i)^2\}_{i=1}^n, 2\epsilon, \frac{\delta}{(9ep/s)^s})|$ , where  $f$  is a univariate estimator, and  $z_i$  are the pseudo-samples obtained by  $z_i = (x_{i+n/2} - x_i)/\sqrt{2}$ .

Observe that since  $\widehat{\Theta}_{f,s}$  and the true covariance  $\Sigma(P)$  are both in  $\mathcal{F}_s$ . Hence, the difference matrix  $\widehat{\Theta}_{f,s} - \Sigma(P)$  has atmost  $2s$  non-zero off diagonal elements. Hence, we can write that  $\|\widehat{\Theta}_{f,s} - \Sigma(P)\|_2 = \sup_{u \in \mathcal{B}_{2s} \cap \mathcal{S}^{p-1}} |u^T (\widehat{\Theta}_{\text{IM}}^{(s)} - \Sigma(P))u|$ , where  $\mathcal{B}_{2s} \cap \mathcal{S}^{p-1}$  is the set of unit vectors which are atmost  $2s$ -sparse. Using the one-step discretization, we get that,

$$\|\widehat{\Theta}_{f,s} - \Sigma(P)\|_2 \leq 2 \sup_{u \in \mathcal{N}^{1/4}(\mathcal{B}_{2s} \cap \mathcal{S}^{p-1})} |u^T (\widehat{\Theta}_{f,s} - \Sigma(P))u|$$

The remainder of the proof follows from the proof of Lemma 7 coupled with the fact that the cardinality of the  $1/4$ -cover of an  $2s$ -sparse ball  $|\mathcal{N}^{1/4}(\mathcal{S}^{p-1})| \leq (\frac{9ep}{s})^s$  (Vershynin, 2009).

### A.8 Proof of Corollary 5

*Proof.* From Corollary 4, we know that the with probability at least  $1 - \delta$  sparse covariance estimator satisfies,

$$\underbrace{\|\widehat{\Theta}_{\text{IM},s} - \Sigma(P)\|_2}_{T_1} \lesssim \underbrace{\|\Sigma(P)\|_2 \epsilon^{1-1/k} + \|\Sigma(P)\|_2 \sqrt{\frac{s \log p}{n}} + \|\Sigma(P)\|_2 \sqrt{\frac{\log 1/\delta}{n}}}_{T_1}$$

Let  $\widehat{\Theta}_{\text{IM},s} - \Sigma(P) = \Delta$ , then, we have that  $\|\Delta\|_2 \leq T_1$ . Using Weyl's Inequality, we know that,

$$|\lambda_{r+1}(\widehat{\Theta}_{\text{IM},s}) - \lambda_{r+1}(\Sigma(P))| \leq \|\Delta\|_2$$

We know that  $\lambda_{r+1}(\Sigma(P)) = 1$ . Hence, we have that  $\lambda_{r+1}(\widehat{\Theta}_{\text{IM},s}) \in 1 \pm T1$ . We also know that  $\lambda_r(\Sigma(P)) = 1 + \Lambda_r$ . Hence, we can now lower bound the eigengap, *i.e.*

$$|\lambda_r(\Sigma) - \lambda_{r+1}(\widehat{\Theta}_{\text{IM},s})| \geq \Lambda_r - T1$$

Under the assumption that  $T1 < \frac{1}{2}\Lambda_r$ , and using Davis-Kahan Theorem (Davis and Kahan, 1970), we get that,

$$\|VV^T - \widehat{V}\widehat{V}^T\|_F \leq \frac{\|\Theta_\delta - \Sigma\|_2}{\Lambda_r - T1} \leq C \frac{T1}{\Lambda_r}$$

□

## A.9 Proof of Lemma 4

Note that the proof of this follows from Lemma 6 (Altschuler et al., 2018), but we provide it for completeness. Let  $F$  be a CDF and let  $Q_{L,F}(p) = \inf\{x \in \mathbb{R} : F(x) \geq p\}$  and  $Q_{R,F}(p) = \inf\{x \in \mathbb{R} : F(x) > p\}$  be the left and right quantile functions. Let

$$R_F(t) \geq \max\{Q_{R,F}(\frac{1}{2} + t) - m, m - Q_{L,F}(\frac{1}{2} - t)\},$$

where  $m$  is the median. Then, given  $n$ -samples from the mixture model, let  $\widehat{m}(\{x_i\}_{i=1}^n)$  be the empirical median. Then, we have that with probability at least  $1 - \delta$ ,

$$|\widehat{m} - m| \leq R\left(\frac{\epsilon}{2(1-\epsilon)} + \sqrt{\frac{2 \log(2/\delta)}{n}}\right).$$

To see this, for each sample  $x_i$  define an indicator variable  $L_i \in \{0, 1\}$ .

$$L_i = \mathbb{I}\left\{x_i \sim Q, \text{ or } (x_i \sim P \text{ and } x_i \geq Q_{R,F}(\frac{1}{2(1-\epsilon)} + a))\right\},$$

for  $a = \frac{\sqrt{\log(2/\delta)}}{(1-\epsilon)\sqrt{n}}$ . Note that

$$\begin{aligned} \Pr(L_i = 1) &\leq \epsilon + (1-\epsilon)\left(1 - \left(a + \frac{1}{2(1-\epsilon)}\right)\right) \\ &\equiv \frac{1}{2} - (1-\epsilon)a \\ \widehat{m} \geq Q_{R,F}\left(\frac{1}{2(1-\epsilon)} + a\right) &\implies \sum_i L_i \geq n/2 \end{aligned}$$

Hence, we have that,

$$\Pr(\widehat{m} > Q_{R,F}\left(\frac{1}{2(1-\epsilon)} + a\right)) \leq \Pr\left(\sum_i L_i \geq n/2\right) \leq \exp(-2n(1-\epsilon)^2 a^2) = \frac{\delta}{2}$$

The other side is also symmetric. Hence, we have that with probability at least  $1 - \delta$ ,

$$|\widehat{m} - m| \leq R\left(\frac{\epsilon}{2(1-\epsilon)} + a\right),$$

where  $a = \frac{1}{(1-\epsilon)}\sqrt{\frac{\log(2/\delta)}{n}}$ . Note that under our assumption that  $P \in \mathcal{P}_{\text{sym}}^{t_0, \kappa}$ , we have that  $R(t) \leq \kappa t$  for all  $t \leq t_0$ . Hence, as long as the contamination level  $\epsilon$ , and confidence level  $\delta$  are such that,

$$\frac{\epsilon}{2(1-\epsilon)} + \frac{1}{(1-\epsilon)}\sqrt{\frac{\log(2/\delta)}{n}} \leq t_0,$$

we have that with probability at least  $1 - \delta$ ,

$$|\widehat{m} - m| \lesssim \kappa\epsilon + \kappa\sqrt{\frac{\log(2/\delta)}{n}}$$
